# Supplementary material for: Tubeimoside I Antagonizes Yoda1-Evoked Piezo1 Channel Activation
Source: PubMed Central journal article supplement (PMC7261832; doi:10.3389/fphar.2020.00768), 2020-05-25
Supplement: DataSheet_1.pdf [file DataSheet_1.pdf]

Figure S1 Chemical structures and inhibitory effects of 92 natural products from Traditional Chinese Medicine used in the screen.

|   | Product Name  | Formula                                                                             | Inhibition Ratio |
|---|---------------|-------------------------------------------------------------------------------------|------------------|
| 1 | Tubeimoside I | 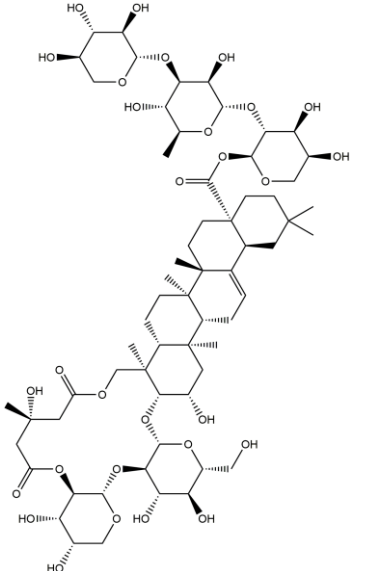   | 90%              |
| 2 | Neomangiferin |   | 90%              |
| 3 | Glabridin     |  | 90%              |

|    |                 |                                                                                     |     |
|----|-----------------|-------------------------------------------------------------------------------------|-----|
| 4  | Mangiferin      | 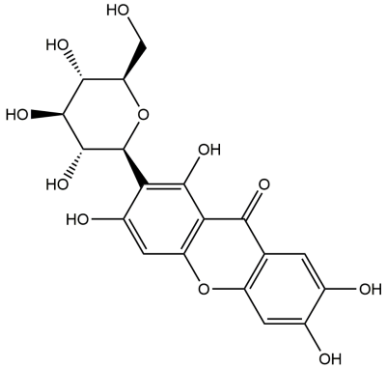   | 90% |
| 5  | Arecoline HBr   |    | 80% |
| 6  | Alpha-Mangostin |   | 70% |
| 7  | Artemisinin     |  | 60% |
| 8  | Xylose          |  | 60% |
| 9  | Bakuchiol       |  | 60% |
| 10 | Rutaecarpine    |  | 50% |

|    |                          |                                                                                                                           |     |
|----|--------------------------|---------------------------------------------------------------------------------------------------------------------------|-----|
| 11 | Schizandrol A            | 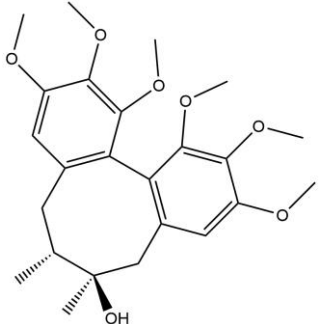                                         | 50% |
| 12 | Echinacoside             |                                          | 45% |
| 13 | Vanillylacetone          |                                         | 40% |
| 14 | Erythritol               |                                        | 40% |
| 15 | Sinomenine hydrochloride |  <p style="text-align: right;">HCl</p> | 40% |
| 16 | Magnolol                 |                                        | 40% |

|    |                            |                                                                                     |               |
|----|----------------------------|-------------------------------------------------------------------------------------|---------------|
| 17 | Salidroside                | 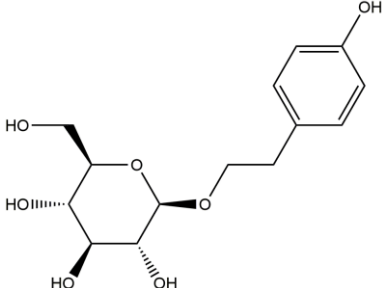   | 33.30%        |
| 18 | Ligustrazine hydrochloride |    | HCl<br>33.30% |
| 19 | cis-Anethole               |    | 30%           |
| 20 | Imperatorin                |  | 30%           |
| 21 | Angelic anhydride          |  | 28%           |
| 22 | Docetaxel                  |  | 25%           |

|    |                        |                                                                                     |     |
|----|------------------------|-------------------------------------------------------------------------------------|-----|
| 23 | Lycorine hydrochloride | 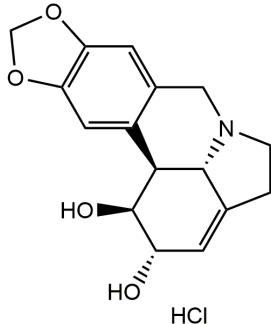   | 24% |
| 24 | Tetrahydropiperine     |    | 23% |
| 25 | Sophocarpine           |   | 20% |
| 26 | Betaine                |  | 20% |
| 27 | Ginsenoside Re         |  | 20% |

|    |                            |                                                                                                        |     |
|----|----------------------------|--------------------------------------------------------------------------------------------------------|-----|
| 28 | Mogroside V                | 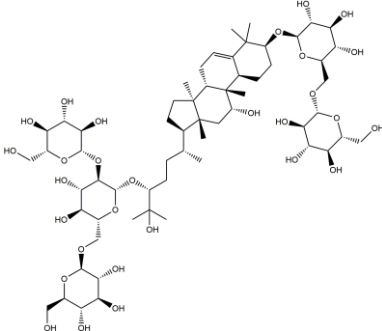                      | 20% |
| 29 | Citral                     |                       | 20% |
| 30 | Genipin                    |                       | 18% |
| 31 | Trigonelline Hydrochloride | <br>Cl <sup>-</sup> | 18% |
| 32 | Tiglic acid                |                     | 16% |
| 33 | Angelic acid               |                     | 16% |

|    |                 |                                                                                                                                                                                                                                                                                                                                                                                                                                                                                                                                                          |     |
|----|-----------------|----------------------------------------------------------------------------------------------------------------------------------------------------------------------------------------------------------------------------------------------------------------------------------------------------------------------------------------------------------------------------------------------------------------------------------------------------------------------------------------------------------------------------------------------------------|-----|
| 34 | Stevioside      | 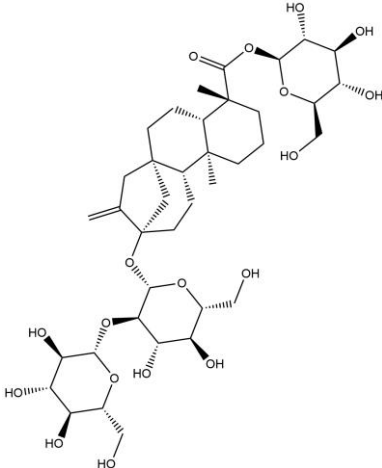 <p>The structure of Stevioside is a complex polyhydroxylated triterpene glycoside. It features a pentacyclic triterpene core with a methyl group at C-13 and a hydroxyl group at C-14. The C-13 position is glycosylated with a disaccharide unit consisting of a glucose molecule linked to a fructose molecule. The glucose moiety has hydroxyl groups at C-2, C-3, C-4, and C-6, while the fructose moiety has hydroxyl groups at C-2, C-3, C-4, and C-5.</p>       | 16% |
| 35 | Geniposide      |  <p>The structure of Geniposide is a cyclic iridoid glycoside. It consists of a six-membered iridoid ring with a methoxy group at C-2, a hydroxyl group at C-3, and a hydroxymethyl group at C-4. The C-5 position is glycosylated with a glucose molecule, which has hydroxyl groups at C-2, C-3, C-4, and C-6.</p>                                                                                                                                                   | 15% |
| 36 | Picroside II    |  <p>The structure of Picroside II is a complex polyhydroxylated triterpene glycoside. It features a pentacyclic triterpene core with a hydroxyl group at C-13 and a hydroxyl group at C-14. The C-13 position is glycosylated with a disaccharide unit consisting of a glucose molecule linked to a fructose molecule. The glucose moiety has hydroxyl groups at C-2, C-3, C-4, and C-6, while the fructose moiety has hydroxyl groups at C-2, C-3, C-4, and C-5.</p> | 15% |
| 37 | Gentiopicroside |  <p>The structure of Gentiopicroside is a cyclic iridoid glycoside. It consists of a six-membered iridoid ring with a hydroxyl group at C-2, a hydroxyl group at C-3, and a hydroxyl group at C-4. The C-5 position is glycosylated with a glucose molecule, which has hydroxyl groups at C-2, C-3, C-4, and C-6.</p>                                                                                                                                                 | 15% |

|    |                        |                                                                                     |     |
|----|------------------------|-------------------------------------------------------------------------------------|-----|
| 38 | Picroside I            | 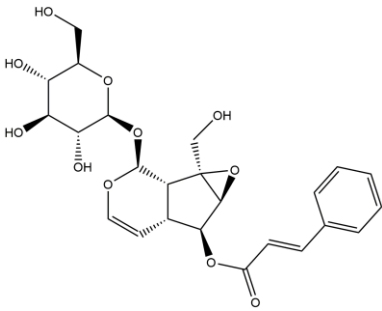   | 15% |
| 39 | Dehydroandrographolide |    | 15% |
| 40 | Carvacrol              |   | 14% |
| 41 | Dihydromyricetin       |  | 10% |
| 42 | Norcantharidin         |  | 10% |
| 43 | Sophoricoside          |  | 10% |



|    |                         |                                                                                     |     |
|----|-------------------------|-------------------------------------------------------------------------------------|-----|
| 44 | Ginkgolide C            | 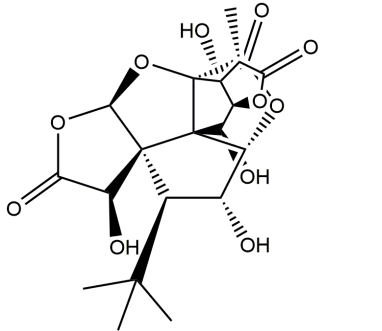   | 10% |
| 45 | Neferine                |    | 10% |
| 46 | Coumarin                |    | 9%  |
| 47 | Celastrol               |  | 8%  |
| 48 | Patchouli alcohol       |  | 8%  |
| 49 | 4-Methoxysalicylic acid |  | 8%  |
| 50 | Methyl gallate          |  | 7%  |

|    |                          |                                                                                     |    |
|----|--------------------------|-------------------------------------------------------------------------------------|----|
| 51 | Paclitaxel               | 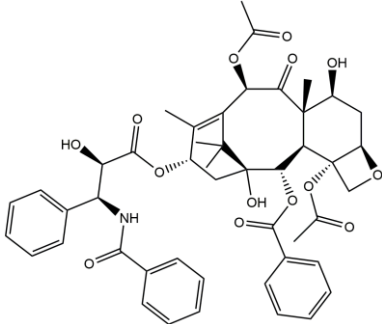   | 5% |
| 52 | Hordenine                |    | 5% |
| 53 | Capsaicin                |   | 5% |
| 54 | Rutin                    |  | 3% |
| 55 | Gastrodin                |  | 3% |
| 56 | Ammonium Glycyrrhizinate |  | 3% |

|    |                             |                                                                                     |    |
|----|-----------------------------|-------------------------------------------------------------------------------------|----|
| 57 | Orsellinic acid ethyl ester | 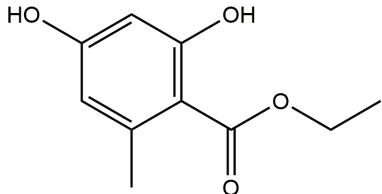   | 3% |
| 58 | Triptolide (PG490)          |    | 3% |
| 59 | Paeoniflorin                |   | 2% |
| 60 | Cinchonine(LA4022 1)        |  | 2% |
| 61 | Genistin (Genistoside)      |  | 2% |
| 62 | Sclareol                    |  | 0% |
| 63 | Sclareolide                 |  | 0% |

|    |                                 |                                                                                     |    |
|----|---------------------------------|-------------------------------------------------------------------------------------|----|
| 64 | Silibinin                       | 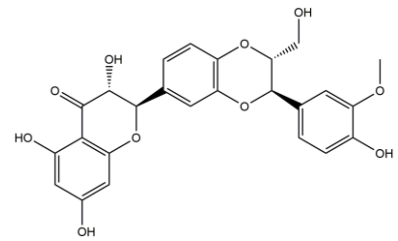   | 0% |
| 65 | Sinomenine                      |    | 0% |
| 66 | Tangeretin                      |    | 0% |
| 67 | Taxifolin<br>(Dihydroquercetin) |   | 0% |
| 68 | Biochanin A                     |  | 0% |
| 69 | Dioscin                         |  | 0% |
| 70 | Diosmetin                       |  | 0% |
| 71 | Lappaconite HBr                 |  | 0% |

|    |                             |                                                                                                                                                                                                                                                                                                                                               |    |
|----|-----------------------------|-----------------------------------------------------------------------------------------------------------------------------------------------------------------------------------------------------------------------------------------------------------------------------------------------------------------------------------------------|----|
| 72 | Naringin<br>Dihydrochalcone | 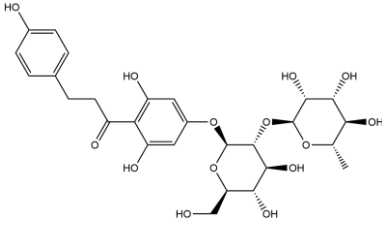 <p>The structure shows a dihydrochalcone core with a 4-hydroxyphenyl group at the C-6 position and a 2,4,6-trihydroxyphenyl group at the C-2 position. The C-4 position is linked to a 2,3,4,6-tetrahydroxy-D-glucopyranose moiety via an ether bridge.</p> | 0% |
| 73 | Polydatin                   |  <p>The structure features a 2,4,6-trihydroxyphenyl group at the C-2 position and a 4-hydroxyphenyl group at the C-6 position. The C-4 position is linked to a 2,3,4,6-tetrahydroxy-D-glucopyranose moiety via an ether bridge.</p>                          | 0% |
| 74 | Sesamin                     |  <p>The structure consists of two 2,4-dihydroxyphenyl groups linked to a central 1,3-dioxolane ring system via ether bridges.</p>                                                                                                                            | 0% |
| 75 | Naringenin                  |  <p>The structure shows a 2,4,6-trihydroxyphenyl group at the C-2 position and a 4-hydroxyphenyl group at the C-6 position. The C-4 position is linked to a 2,3,4,6-tetrahydroxy-D-glucopyranose moiety via an ether bridge.</p>                            | 0% |
| 76 | Curcumol                    |  <p>The structure is a complex polycyclic molecule with multiple stereocenters, including a hydroxyl group and a methyl group.</p>                                                                                                                         | 0% |
| 77 | Geniposidic acid            |  <p>The structure shows a 2,4,6-trihydroxyphenyl group at the C-2 position and a 4-hydroxyphenyl group at the C-6 position. The C-4 position is linked to a 2,3,4,6-tetrahydroxy-D-glucopyranose moiety via an ether bridge.</p>                           | 0% |

|    |                               |                                                                                     |    |
|----|-------------------------------|-------------------------------------------------------------------------------------|----|
| 78 | Astragaloside A               | 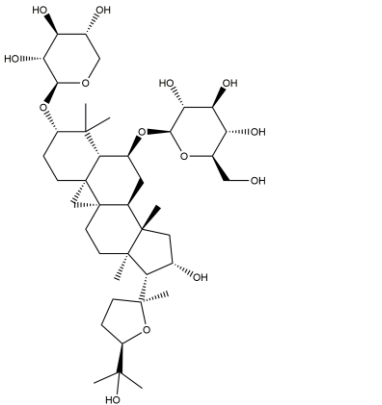   | 0% |
| 79 | Apocynin                      |    | 0% |
| 80 | Cephalomannine                |   | 0% |
| 81 | Cinnamic acid                 |  | 0% |
| 82 | Cinnamaldehyde                |  | 0% |
| 83 | 10,11-Dimethoxystr<br>ychnine |  | 0% |
| 84 | Succinic acid                 |  | 0% |

|    |                                      |                                                                                                                                                                                        |    |
|----|--------------------------------------|----------------------------------------------------------------------------------------------------------------------------------------------------------------------------------------|----|
| 85 | Guggulsterone E&Z                    |                                                                                                       | 0% |
| 86 | Rebaudioside A                       |                                                                                                       | 0% |
| 87 | Monocrotaline                        |                                                                                                       | 0% |
| 88 | Taurocholic acid sodium salt hydrate | <p data-bbox="727 913 767 943">H<sub>2</sub>O</p> <p data-bbox="759 965 799 994">Na<sup>+</sup></p>  | 0% |
| 89 | Raffinose                            |                                                                                                     | 0% |

|    |                   |                                                                                    |    |
|----|-------------------|------------------------------------------------------------------------------------|----|
| 90 | Thymol            | 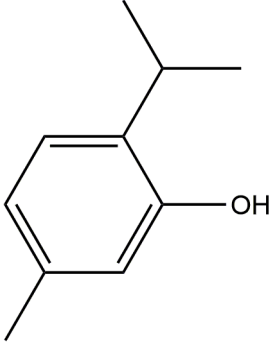  | 0% |
| 91 | 7-Methoxycoumarin |   | 0% |
| 92 | Benzyl cinnamate  |  | 0% |
